# Supplementary material for: Rabies in the Caribbean: A Situational Analysis and Historic Review
Source: MDPI journal article supplement (doi:10.3390/tropicalmed3030089), 2018-08-20
Supplement: s1 [file s1]

## Rabies in the Caribbean: a situational analysis and historic review

Janine Seetahal \*, Alexandra Vokaty, Marco Vigilato, Christine Carrington, Jennifer Pradel, Bowen Louison, Astrid Van Sauers, Rohini Roopnarine, Jusayma Gonzalez Arrebato, Max Millien, Colin James, Charles Rupprecht

**Table S1.** Rabies disease status and national notification status of Caribbean countries and territories surveyed.

| Location                       | Rabies status reported on survey | Notifiable disease in animals | Notifiable disease in humans |
|--------------------------------|----------------------------------|-------------------------------|------------------------------|
| Aruba                          | Non-endemic                      | No                            | No                           |
| Barbados                       | Non-endemic                      | Yes                           | Yes                          |
| Belize                         | Endemic                          | Yes                           | Yes                          |
| Bonaire                        | Non-endemic                      | Yes                           | Yes                          |
| Bermuda                        | Non-endemic                      | Yes                           | Yes                          |
| British Virgin Islands         | Non-endemic                      | No                            | No                           |
| Cayman islands                 | Non-endemic                      | Yes                           | Yes                          |
| Cuba                           | Endemic                          | Yes                           | Yes                          |
| Curacao                        | Non-endemic                      | Yes                           | Yes                          |
| Dominica                       | Non-endemic                      | Yes                           | No                           |
| Dominican Republic             | Endemic                          | Yes                           | Yes                          |
| French Guiana                  | Endemic                          | Yes                           | Yes                          |
| Grenada                        | Endemic                          | Yes                           | Yes                          |
| Guadeloupe                     | Non-endemic                      | Yes                           | Yes                          |
| Guyana                         | Endemic                          | Yes                           | Yes                          |
| Haiti                          | Endemic                          | Yes                           | Yes                          |
| Jamaica                        | Non-endemic                      | Yes                           | No                           |
| Nevis (St. Kitts)              | Non-endemic                      | Yes                           | No                           |
| Martinique                     | Non-endemic                      | Yes                           | Yes                          |
| Montserrat                     | Non-endemic                      | Yes                           | Yes                          |
| Puerto Rico                    | Endemic                          | Yes                           | Yes                          |
| St. Eustatius                  | Non-endemic                      | Yes                           | Yes                          |
| St. Kitts                      | Non-endemic                      | Yes                           | No                           |
| St. Lucia                      | Non-endemic                      | Yes                           | Yes                          |
| St. Maarten                    | Non-endemic                      | No                            | Yes                          |
| St. Vincent and the Grenadines | Non-endemic                      | Yes                           | Yes                          |
| Suriname                       | Endemic                          | Yes                           | Yes                          |
| Trinidad and Tobago            | Endemic                          | Yes                           | Yes                          |
| Turks and Caicos               | Non-endemic                      | Yes                           | Yes                          |
| US Virgin Islands              | Non-endemic                      | Yes                           | Yes                          |

**Table S2.** Mandatory reporting of rabies virus exposure incidents in humans and animals.

| <b>Location</b>                | <b>Human incidents</b> | <b>Species involved</b>               | <b>Animal incidents</b> | <b>Species involved</b>         |
|--------------------------------|------------------------|---------------------------------------|-------------------------|---------------------------------|
| Belize                         | Yes                    | Dog, bat, fox and any wild animal     | No                      | n.a.                            |
| Cuba                           | Yes                    | Dog, bat, mongoose, rodents, cat, pig | No                      | n.a.                            |
| Dominican Republic             | Yes                    | Dog, mongoose                         | Yes                     | Dog, bat, mongoose              |
| French Guiana                  | Yes                    | Dog, bat, mongoose, all mammals       | Yes                     | Dog, bat, mongoose, all mammals |
| Grenada                        | Yes                    | Dog, mongoose, ruminants, cat         | Yes                     | Dog, mongoose, cat              |
| Guyana                         | n.r.                   | n.r.                                  | Yes                     | Bat                             |
| Haiti                          | Yes                    | Dog                                   | Yes                     | Dog                             |
| Puerto Rico                    | Yes                    | All mammals                           | Yes                     | All mammals                     |
| Suriname                       | No                     | n.a.                                  | No                      | n.a.                            |
| Trinidad and Tobago            | No                     | n.a.                                  | Yes                     | Not specified                   |
| Aruba                          | No                     | n.a.                                  | No                      | n.a.                            |
| Barbados                       | No                     | n.a.                                  | No                      | n.a.                            |
| Bonaire                        | Yes                    | Dog                                   | Yes                     | Dog                             |
| Bermuda                        | Yes                    | Dog, cat                              | No                      | n.a.                            |
| British Virgin Islands         | No                     | n.a.                                  | No                      | n.a.                            |
| Cayman Islands                 | No                     | n.a.                                  | No                      | n.a.                            |
| Dominica                       | n.r.                   | n.r.                                  | n.r.                    | n.r.                            |
| St. Maarten                    | Yes                    | Dog                                   | No                      | n.a.                            |
| Guadeloupe                     | Yes                    | Dog, bat, cat, cattle                 | No                      | n.a.                            |
| Jamaica                        | No                     | n.a.                                  | No                      | n.a.                            |
| Turks and Caicos               | No                     | n.a.                                  | Yes                     | Dog                             |
| US Virgin Islands              | Yes                    | Dog, mongoose                         | Yes                     | Dog, mongoose                   |
| Montserrat                     | Yes                    | Dog                                   | No                      | n.a.                            |
| Curacao                        | No                     | n.a.                                  | Yes                     | Dog, bat                        |
| Martinique                     | Yes                    | All mammals                           | Yes                     | All mammals                     |
| Sint Eustatius                 | Yes                    | Dog                                   | Yes                     | Dog                             |
| St. Kitts                      | No                     | n.a.                                  | No                      | n.a.                            |
| Nevis (St. Kitts)              | No                     | n.a.                                  | No                      | n.a.                            |
| St. Lucia                      | No                     | n.a.                                  | No                      | n.a.                            |
| St. Vincent and the Grenadines | No                     | n.a.                                  | No                      | n.a.                            |

**n.r.** (no response), **n.a.** (not applicable)

**Table S3.** Bat species richness and species identified as rabies positive in the Caribbean

| Location                                  | Bat species richness (No. of species) | Bat species positive for rabies                                                                                                                                                                                                                                                                                                                                                                                                                                                       |
|-------------------------------------------|---------------------------------------|---------------------------------------------------------------------------------------------------------------------------------------------------------------------------------------------------------------------------------------------------------------------------------------------------------------------------------------------------------------------------------------------------------------------------------------------------------------------------------------|
| Belize                                    | 70 [1]                                | <i>Myotis fortidens</i> (Cinnamon myotis bat), <i>Myotis nigricans</i> (Black myotis bat), <i>Artibeus lituratus</i> (Great fruit-eating bat), <i>Artibeus jamaicensis</i> (Jamaican fruit-eating bat), <i>Phyllostomus discolor</i> (Pale spear-nosed bat), <i>Molossus molossus</i> (Pallas's mastiff bat), <i>Molossus sinaloae</i> (Sinaloan mastiff bat), <i>Desmodus rotundus</i> (Common vampire bat) [2]                                                                      |
| Cuba                                      | 26 [3]                                | <i>Eptesicus fuscus</i> (Big brown bat), <i>Eumops glaucinus</i> (Wagner's bonneted bat), <i>Artibeus jamaicensis</i> (Great fruit-eating bat), <i>Molossus molossus</i> (Pallas's mastiff bat) [2,4,5]                                                                                                                                                                                                                                                                               |
| French Guiana                             | 102 [6,7]                             | <i>Desmodus rotundus</i> (Common vampire bat) [8]                                                                                                                                                                                                                                                                                                                                                                                                                                     |
| Grenada                                   | 12 [9]                                | <i>Artibeus jamaicensis</i> (Great fruit-eating bat), <i>Molossus molossus</i> (Pallas's mastiff bat) [10,11]                                                                                                                                                                                                                                                                                                                                                                         |
| Guyana                                    | 121 [6,7]                             | No surveillance                                                                                                                                                                                                                                                                                                                                                                                                                                                                       |
| Hispaniola (Haiti and Dominican Republic) | 18 [12]                               | <i>Tadarida brasiliensis</i> (Brazilian free-tailed bat)* [13]                                                                                                                                                                                                                                                                                                                                                                                                                        |
| Puerto Rico                               | 13 [14]                               | None identified to date [14,15]                                                                                                                                                                                                                                                                                                                                                                                                                                                       |
| Suriname                                  | 96 [7]                                | No surveillance                                                                                                                                                                                                                                                                                                                                                                                                                                                                       |
| Trinidad                                  | 69 [16,17]                            | <i>Desmodus rotundus</i> (Common vampire bat), <i>Diaemus youngi</i> (White winged vampire bat), <i>Carollia perspicillata</i> (Seba's short-tailed bat), <i>Artibeus lituratus</i> (Great fruit-eating bat), <i>Artibeus jamaicensis</i> (Jamaican fruit-eating bat), <i>Molossus molossus</i> (Pallas's mastiff bat), <i>Diclidurus albus</i> (Northern ghost bat), <i>Pteronotus davyi</i> (Davy's naked-backed bat), <i>Pteronotus parnellii</i> (Parnell's mustached bat) [2,18] |

\* isolated in the Dominican Republic

## References

1. Fenton, M.B.; Bernard, E.; Hollis, L.; Johnston, D.S.; Lausen, C.L.; Ratcliffe, J.M.; Riskin, D.K.; Taylor, J.R.; Zigouris, J. The bat fauna of Iamanai, Belize: Roosts and tropical roles *Journal of Tropical Ecology* **2001**, *17*, 511-524.
2. Constantine, D.G. *Bat rabies and other lyssavirus infections*. United States Geological Survey National Wildlife Health Center: Reston, Virginia, USA, 2009; Vol. 1329.
3. Willig, M.R.; Presley, S.J.; Bloch, C.P.; Genoways, H.H. Macroecology of Caribbean bats: Effects of area, elevation, latitude and hurricane-induced disturbance. In *Island bats: Evolution, ecology and conservation*, Fleming, T.H.; Racey, P.A., Eds. The University of Chicago Press Ltd: Chicago, USA, 2009; pp 216-264.

4. Nadin Davis, S.A.; Torres, G.; Ribas, M., .; Guzman, M., .; Cruz De La Paz, R.; Morales, M.; Wandeler, A.I. A molecular epidemiological study of rabies in cuba. *Epidemiol Infect* **2006**, *134*, 1313-1324.
5. Cordero, Y.; de los Angeles, R.M.; Beatriz, C.H.; Cintra, Y.; Tejero, Y.; Gonzalez, J.; Daileny, P.; Castilho, J. In *Epidemiology and molecular characterization of rabies in cuba from 2003 to 2016*, XXVIII Rabies in the Americas, Calgary, Alberta, Canada, 2017; Calgary, Alberta, Canada, p 17.
6. Lim, B.K.; Emngstrom, M.D. Species diversity of bats (mammalia: Chiropter) in iwokrama forest, guyana, and the guianan subregion: Implications for conservation *Biodiversity & Conservation* **2001**, *10*, 613-657.
7. Shapley, R.L.; Wilson, D.E.; Warren, A.N.; Barnett, A.A. Bats of the potaro plateau region, western guyana. *Mammalia* **2005**, *69*, 375-394.
8. Berger, F.; Desplanches, N.; Baillargeaux, S.; Joubert, M.; Miller, M.; Ribadeau-Dumas, F.; Spiegel, A.; Bourhy, H. Rabies risk: Difficulties encountered during management of grouped cases of bat bites in 2 isolated villages in french guiana. *PLoS Negl Trop Dis* **2013**, *7*.
9. Genoways, H.H.; Phillips, C.J.; Baker, R.J. Bats of the antillean island of grenada: A new zoogeographic perspective. *Mammalogy Papers: University of Nebraska State Museum* **1998**, *98*.
10. Price, J.L.; Everard, C.O.R. Rabies virus and antibody in bats in grenada and trinidad. *Journal of Wildlife Diseases* **1977**, *131-134*.
11. Everard, C.O.R.; Murray, D.; Gilbert, P.K. Rabies in grenada. *Transactions of the Royal Society of Tropical Medicine and Hygiene* **1972**, *66*, 878-888.
12. Flanders, J.; Yohe, L.; Rossiter, S.; Davalos, L.M. Field key to the bats of hispanola. **2014**.
13. Organizacion Panamericana de la Salud (OPS). *Republica dominicana: Elimination of dog-transmitted rabies in latin america: Situation analysis*; Washington, 2004; pp 58-59.
14. Gannon, M.R.; Kurta, A.; Rodriguez-Duran, A.; Willig, M.R. *Bats of puerto rico: An island focus and an caribbean perspecitive*. Texas Tech University Press: Lubbock, Texas, USA, 2005.
15. Everard, C.O.R.; Everard, J.D. Mongoose rabies in the caribbean. *Annals of NY Acad Sci* **1992**, *653*, 356-366.
16. Gomes, G.A.; Reid, F.A. *Bats of trinidad and tobago: A field guide and natural history*. Trinibats: Trinidad, 2015.
17. Moratelli, R.; Wilson, D.E.; Novaes, R.L.M.; Helgen, K.M.; Gutierrez, E.E. Caribbean myotis (chiroptera, vespertilionidae), with description of a new species from trinidad and tobago. *Journal of Mammology* **2017**, *1-15*.
18. Goodwin, G.G.; Greenhall, A. *A review of the bats of trinidad and tobago: Descriptions, rabies infection and ecology*. 1961; Vol. 122.
